1 **Long-distance dispersal, ice sheet dynamics, and mountaintop isolation underlie the genetic**  
2 **structure of glacier ice worms**

3

4 Scott Hotaling<sup>1</sup>, Daniel H. Shain<sup>2</sup>, Shirley A. Lang<sup>3</sup>, Robin K. Bagley<sup>4</sup>, Lusha M. Tronstad<sup>5</sup>,  
5 David W. Weisrock<sup>6</sup>, and Joanna L. Kelley<sup>1</sup>

6

7 **Affiliations:**

8 <sup>1</sup> School of Biological Sciences, Washington State University, Pullman, WA, USA

9 <sup>2</sup> Department of Biology, Rutgers University, Camden, NJ, USA

10 <sup>3</sup> Graduate School of Biomedical Sciences, Rowan University, Stratford, NJ, USA

11 <sup>4</sup> Department of Biology, University of Iowa, Iowa City, IA

12 <sup>5</sup> Wyoming Natural Diversity Database, University of Wyoming, Laramie, WY, USA

13 <sup>6</sup> Department of Biology, University of Kentucky, Lexington, KY, USA

14

15 **Correspondence:** Scott Hotaling, School of Biological Sciences, Washington State University,  
16 Pullman, WA, 99164, USA; Email: [scott.hotaling@wsu.edu](mailto:scott.hotaling@wsu.edu); Phone: (828) 507-9950; ORCID:  
17 0000-0002-5965-0986

18

19 **Running title:** Population genomics of ice worms

20

21 **Keywords:** RAD sequencing, Pacific Northwest, phylogeography, *Mesenchytraeus solifugus*,  
22 global change biology, annelid

23

24 **Abstract:**

25 Disentangling the contemporary and historical factors underlying the spatial distributions of  
26 species is a central goal of biogeography. For species with broad distributions but little capacity  
27 to actively disperse, disconnected geographic distributions highlight the potential influence of  
28 passive, long-distance dispersal (LDD) on their evolutionary histories. However, dispersal alone  
29 cannot completely account for the biogeography of any species, and other factors—e.g., habitat  
30 suitability, life history—must also be considered. North American ice worms (*Mesenchytraeus*  
31 *solifugus*) are glacier-obligate annelids that inhabit coastal North American glaciers from Oregon

32 to Alaska. Previous studies identified a complex biogeographic history for ice worms, with  
33 evidence for genetic isolation, unexpectedly close relationships among geographically disjunct  
34 lineages, and evidence for contemporary migration across large (>1,500 km) areas of unsuitable  
35 habitat. In this study, we collected genome-scale sequence data for most of the known ice worm  
36 range. We found support for a deep divergence between populations along the Pacific Coast and  
37 the inland flanks of the Coast Mountains (mean  $F_{ST} = 0.60$ ) as well as support for LDD from  
38 Alaska to Vancouver Island, perhaps mediated by migrating birds. Our results highlight the  
39 power of genomic data for disentangling complex biogeographic patterns, including the presence  
40 of LDD.

41

## 42 **Introduction:**

43 For more than a century, long-distance dispersal (LDD) among presumably isolated  
44 populations has intrigued biologists [1-4]. Historically considered rare and unpredictable, the  
45 idea that LDD can act as a general mechanism influencing the biogeography of presumably  
46 dispersal-limited, macroscopic organisms has gained traction in recent years, with examples  
47 accumulating for both plants [5] and invertebrates [6-9]. Many animal vectors play an integral  
48 role in plant and invertebrate LDD [e.g., 10, 11], however, in most cases, the resulting LDD is  
49 limited to < 10 km. For more extreme LDD events (e.g., > 100 km), the most common animal  
50 vector is likely migratory birds, as they seasonally move by the millions over broad spatial scales  
51 and geographic barriers, visiting similar habitats along the way [12, 13]. Through this  
52 mechanism, dispersal units (e.g., whole organisms, eggs, seeds, etc.) may be ingested and  
53 dispersed internally or by directly adhering to the bird's exterior [12]. Thus, as long as there is an  
54 opportunity for migratory birds and dispersal units to interact, the opportunity also exists for  
55 LDD. Physically quantifying LDD is difficult, however, because it requires real-time sampling  
56 and searching (internal and external) of migrating birds for hitchhiking dispersers. Moreover,  
57 because rare migratory events can affect species distributions [14] and influence genetic  
58 differentiation among populations [15], even thorough physical surveys of migratory birds that  
59 find no evidence for LDD cannot rule out its presence. Therefore, alternative approaches for  
60 detecting and characterizing LDD should be employed. Because population genomic tools are  
61 well-suited to detecting gene flow among populations [e.g., 16], these tools are also well-suited  
62 to the indirect detection of LDD, even in the absence of field observations.

63 Many mechanisms influence genetic relationships among taxa and a range of factors  
64 should be considered when attempting to reconstruct biogeographic patterns. For instance, pulses  
65 and contractions of glaciers and ice sheets have shaped the evolutionary histories of populations  
66 and species throughout Earth's history [17-20]. These ice sheet dynamics typically affect  
67 organisms as ice traverses the landscape, separating and reconnecting populations as it expands  
68 and contracts. However, some species are directly tied to ice sheets [e.g., the meltwater stonefly,  
69 17] and are therefore much more susceptible to ice sheet influence on their evolutionary  
70 trajectories. Perhaps no species is more directly tied to ice sheets than the glacier ice worms,  
71 *Mesenchytraeus solifugus* in North America [21] and *Sinenchytraeus glacialis* in Tibet [22]. The  
72 geographic range of *M. solifugus* (hereafter "ice worm") follows a coastal arc from the Chugach  
73 Mountains in southeast Alaska to the Cascade Volcanoes of Washington and Oregon [24]. Ice  
74 worms can also not tolerate temperatures more than roughly  $\pm 7$  °C from freezing and requires  
75 glacier ice for survival and reproduction [23]. With such unique ecology and physiology, and a  
76 dispersal-limited life history, the evolutionary history of ice worms since diverging from  
77 conspecifics [25, 26] should be relatively simple, with gene flow occurring during glacial periods  
78 and isolation (paired with genetic drift) driving divergence among mountaintop-isolated  
79 populations during interglacial periods. Natural systems, however, are often more complex than  
80 expected and indeed, the evolutionary history of ice worms challenges general expectations of  
81 gene flow and evolutionary dynamics in mountain systems.

82 Previous genetic studies based on one or two genetic markers identified three ice worm  
83 lineages: a "northern" clade in southern Alaska, a "central" clade in southeast Alaska and  
84 northern British Columbia (BC), and a "southern" clade ranging over much of BC to southern  
85 Oregon [23-25]. Surprisingly, phylogenetic evidence supported the northern and southern  
86 lineages as being most closely related to one another despite the central clade separating them  
87 geographically. The most curious aspect of ice worm biogeography, however, has been the  
88 repeated discovery of closely related ice worms on glaciers several hundred to thousands of  
89 kilometers south of their closest genetic relatives [23, 25; P. Wimberger, unpublished data].  
90 These disjunct northern ice worms co-occurred with, but appeared genetically distinct from, their  
91 conspecifics (either central or southern clade ice worms) on the same glaciers. Dial *et al.* [23]  
92 laid out three possible explanations for this pattern: wind transport, passerine-mediated dispersal,  
93 or a more extensive previous range of the northern clade. While wind transport seems unlikely,

94 the potential for passerine-mediated dispersal is reasonable, particularly in light of other  
95 examples of bird-mediated LDD [see 7, 27]. The third scenario, a more extensive distribution of  
96 the northern clade with holdover lineages inhabiting the same glacier as more recent colonizers  
97 could indeed result in more than one distinct lineage on the same glacier. However, if this recent  
98 colonization occurred at the Last Glacial Maximum when ice sheet extent last peaked in the  
99 region, recently colonizing lineages should not remain closely related to the source without at  
100 least some degree of contemporary gene flow.

101 In this study, we leveraged a modern population genomic toolkit to add new perspective  
102 to the age-old challenge of identifying LDD in wild populations. We also provide new insight  
103 into how multiple factors can interact to shape the evolutionary history of species. We  
104 hypothesized that the biogeographic history of ice worms stemmed from a confluence of three  
105 main factors: extreme LDD, glacier dynamics, and mountaintop isolation. To test this hypothesis,  
106 we generated a genome-wide single nucleotide polymorphism (SNP) data set to answer three  
107 more-specific questions: (1) How do the clades previously diagnosed from a small number of  
108 markers hold up to genome-wide scrutiny? (2) What, if any, genomic evidence exists for LDD in  
109 ice worms? (3) How do the evolutionary relationships among ice worm populations and genetic  
110 clusters align with glacial history in the region [e.g., 28]? Beyond a refined view of ice worm  
111 evolution, our study confirms that LDD does occur in ice worms, providing an example of LDD  
112 in an annelid and a rare population genomic exploration of the process. Moreover, while  
113 considerable evidence details the existence of refugia in the Pacific Northwest (PNW) during the  
114 Pleistocene [29], few studies have explored how ice sheet dynamics influenced the evolutionary  
115 history of species directly tied to them [e.g., 17]. Our results reveal the profound impact that a  
116 putative ice ridge that formed along the crest of the Coast Mountains [28] may have had on ice  
117 worm evolution, possibly precipitating an ongoing speciation event. Broadly, our findings  
118 highlight the power for population genomics to capture contemporary evidence of LDD while  
119 also providing novel evidence for reconstructing the glacial history of a region.

120 **Table 1.** Sampling information and summary statistics for all ice worm populations included in this study.  
121 Abbreviations:  $n$  = sample size,  $\pi$  = nucleotide diversity, Het = heterozygosity,  $F_{IS}$  = inbreeding  
122 coefficient, AK = Alaska, BC = British Columbia, VI = Vancouver Island.  $\pi$ , Het, and  $F_{IS}$  were calculated  
123 for variable sites only.

| Population          | Latitude, longitude | State/Prov. | Elev. (m) | $n$ | $\pi$ | Het   | $F_{IS}$ |
|---------------------|---------------------|-------------|-----------|-----|-------|-------|----------|
| Learnard (LEA)      | 60.806, -148.721    | AK          | 624       | 3   | 0.114 | 0.100 | 0.026    |
| Davidson (DAV)      | 59.067, -135.551    | AK          | 986       | 15  | 0.078 | 0.065 | 0.037    |
| Treaty (TRE)        | 56.586, -130.151    | BC          | 1376      | 8   | 0.026 | 0.033 | -0.012   |
| Bear (BEA)          | 56.096, -129.681    | BC          | 648       | 6   | 0.039 | 0.046 | -0.013   |
| William Brown (WIB) | 54.611, -129.129    | BC          | 1260      | 6   | 0.056 | 0.057 | 0.000    |
| Jacobson (JAC)      | 52.050, -126.072    | BC          | 1249      | 5   | 0.108 | 0.106 | 0.005    |
| White Mantle (WHM)  | 50.795, -125.153    | BC          | 1764      | 8   | 0.131 | 0.135 | -0.005   |
| Comox (COM)         | 49.545, -125.355    | BC (VI)     | 1881      | 4   | 0.091 | 0.072 | 0.034    |
| Mariner (MAR)       | 49.460, -125.764    | BC (VI)     | 1754      | 4   | 0.098 | 0.084 | 0.024    |

124

## 125 **Methods:**

### 126 *Sample collection, library preparation, and SNP calling*

127 During the summer of 2009, ice worms were collected from nine glaciers across most of  
128 their range (Figs. 1, S1; Table 1). Samples were stored in > 80% EtOH until DNA was extracted  
129 from 59 ice worms using a Qiagen DNEasy Blood and Tissue Kit. Double-digest restriction-site  
130 associated DNA sequencing libraries were prepared following Peterson *et al.* [30] with  
131 restriction enzymes EcoRI and NlaIII. During library preparation, samples were divided into two  
132 groups and each sample was assigned a unique, variable-length barcode [31] which was  
133 incorporated during adapter ligation. Size selection for a 350 bp  $\pm$  35 bp window was performed  
134 with a Pippin Prep (Sage Science), and both sample groups were subsequently amplified using  
135 PCR primers containing a group-specific barcode. The 59-sample library was sequenced on one  
136 lane of an Illumina HiSeq4000 at the University of Illinois High-Throughput Sequencing and  
137 Genotyping Unit with single-end, 100 bp chemistry.

138 Raw reads were demultiplexed, quality-filtered, and RAD loci were assembled *de novo*  
139 using the *process\_radtags* and *denovo\_map* functions of the Stacks v1.46 pipeline [32]. We  
140 allowed a maximum distance between stacks of 2 and a minimum read depth of 10. Next, we  
141 applied a stringent filtering scheme to identify high-confidence SNPs that were shared among  
142 many individuals. We only included SNPs if they were present in  $\geq 5$  populations, genotyped in  
143  $\geq 50\%$  of individuals per population, and were in Hardy-Weinberg equilibrium with a minor  
144 allele frequency of  $\geq 0.025$  overall. We further restricted analyses to one random SNP per locus  
145 for all analyses except fineRADstructure (see below). All post-Stacks filtering steps were

146 performed in PLINK v1.07 [33] and the commands used in this study are provided on GitHub  
 147 ([https://github.com/scotthotaling/ice\\_worm\\_ddRAD](https://github.com/scotthotaling/ice_worm_ddRAD)).

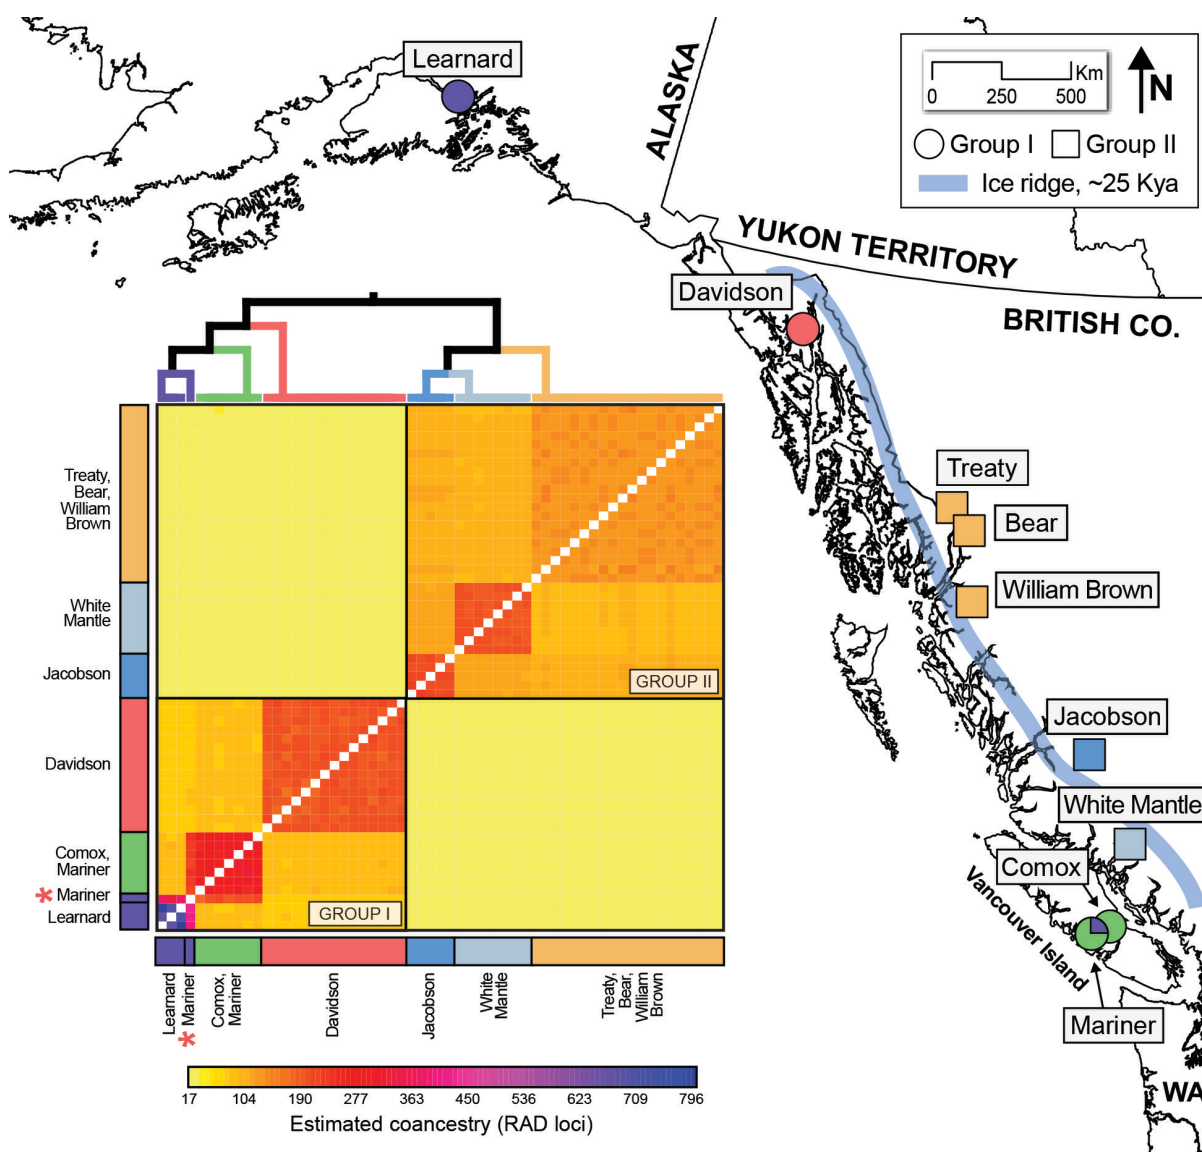

148  
 149 **Figure 1.** Ice worm populations sampled for this study. Color-coding reflects the results of a  
 150 fineRADstructure coancestry analysis. Group I (circles) and II (square) populations were generally  
 151 defined by their presence to the east or west of a putative ice ridge that formed during the Pleistocene  
 152 ~25,000 years ago [28] as well as their distance to the Pacific Ocean. The deep divergence between  
 153 groups I and II is clearly evident along with more recent differentiation within each group. One individual  
 154 from the Mariner Glacier (asterisk) is admixed between the Mariner/Comox (Vancouver Island) and  
 155 Learnard (southern Alaska) clusters, indicating recent LDD.

156  
 157 *Population genetic and phylogenetic analyses*

158 For each population, we calculated nucleotide diversity ( $\pi$ ), heterozygosity (Het), and the  
 159 inbreeding coefficient ( $F_{IS}$ ). We also calculated a pair-wise AMOVA  $F_{ST}$  for all population



160 combinations [34] – using the *populations* module in Stacks. To test for a signature of isolation-  
161 by-distance [IBD, 35], we estimated Euclidean distances among sites with Google Earth and  
162 tested the correlation between geographic distance and  $F_{ST}$  with four Mantel tests performed in  
163 GenoDive v2.0b27 [36]. The first Mantel test included all nine populations and the second  
164 excluded both Vancouver Island (VI) populations from the Mariner and Comox Glaciers to  
165 assess whether unique histories for those populations were significantly altering results. The  
166 third and fourth Mantel tests focused on signatures of IBD within groups “I” and “II” (see  
167 Results). We also measured Euclidean distances for each population to the Pacific Ocean in  
168 Google Earth Pro as an additional spatial comparison of groups I and II. We determined if mean  
169 distances to the Pacific Ocean differed between the two groups with a one-way ANOVA.

170 Population structure was inferred in two ways: a maximum likelihood-based method  
171 using ADMIXTURE 1.3.0 [37] and a discriminant analysis of principal components (DAPC)  
172 with the R package *adegenet* [38]. ADMIXTURE analyses were performed with default settings,  
173 a range of clusters ( $K$ ) from 1-12, and 25 replicates per  $K$  with the current time as the random  
174 seed. The cross-validation (CV) error for each  $K$  was plotted to identify the best-fit  $K$  (minimized  
175 CV across the mean of all replicates for each  $K$ ). After identifying the best-fit  $K$ , we considered  
176 the replicate that minimized CV across all 25 replicates for all  $K$ 's to be the best-fit solution  
177 overall. However, because all runs did not converge on the same result, we also inspected best-fit  
178 solutions for other replicates of  $K = 7$  (the best-fit  $K$  overall) to clarify the distribution of best-fit  
179 solutions. For DAPC, we first used the *find.clusters* function to identify the optimal  $K$  [i.e., the  $K$   
180 with the lowest Bayesian Information Criterion (BIC)]. Next, to avoid over-fitting of the model,  
181 we retained the appropriate number of principal components (PCs) according to the  $\alpha$ -score [PCs  
182 retained = 6, Fig. S2; 38]. We performed a final DAPC analysis using the best-fit  $K$  and optimal  
183 number of PCs identified in the previous two steps.

184 We extended our population structure analyses to infer both shared ancestry and  
185 phylogenetic relationships in two ways: a nearest neighbor haplotype approach to infer  
186 coancestry with fineRADstructure [39] and phylogenetic relationships inferred from singular  
187 value decomposition estimates for quartets of tips using SVDQuartets [40] as implemented in  
188 PAUP\* v4.0a159 [41]. For fineRADstructure, we used 100,000 burn-in iterations followed by  
189 100,000 iterations sampled every 1,000 steps for the Markov chain Monte Carlo clustering  
190 algorithm. Next, we used 10,000 iterations of the tree-building algorithm to assess genetic

191 relationships among clusters. Since fineRADstructure is a haplotype-based approach, analyses  
 192 were performed using all SNPs for a given RAD locus (i.e., a haplotype) rather than randomly  
 193 selected single SNPs per locus. For SVDQuartets, we performed exhaustive sampling of all  
 194 possible quartets (every combination of four tips) and branch support was estimated with 100  
 195 nonparametric bootstrap replicates.

196 **Table 2.** Above the diagonal: Pair-wise AMOVA  $F_{ST}$  values for all localities populations included in this  
 197 study. Mean  $F_{ST}$  (bottom row) refers to the average pair-wise differentiation for columnar populations  
 198 versus all others. Below the diagonal (in gray): mean pair-wise shared loci for the fineRADstructure  
 199 coancestry analysis (see Fig. 1).

|               | LEA   | DAV   | TRE   | BEA   | WIB   | JAC   | WHM   | COM   | MAR   |
|---------------|-------|-------|-------|-------|-------|-------|-------|-------|-------|
| LEA           | --    | 0.333 | 0.634 | 0.626 | 0.608 | 0.586 | 0.557 | 0.347 | 0.344 |
| DAV           | 74.9  | --    | 0.567 | 0.557 | 0.541 | 0.527 | 0.515 | 0.290 | 0.295 |
| TRE           | 19.8  | 20.0  | --    | 0.153 | 0.207 | 0.275 | 0.250 | 0.656 | 0.652 |
| BEA           | 19.0  | 19.9  | 127.2 | --    | 0.165 | 0.250 | 0.222 | 0.650 | 0.645 |
| WIB           | 20.1  | 20.5  | 119.8 | 123.0 | --    | 0.216 | 0.201 | 0.630 | 0.628 |
| JAC           | 21.0  | 20.4  | 99.7  | 99.5  | 104.7 | --    | 0.172 | 0.604 | 0.600 |
| WHM           | 21.6  | 19.1  | 90.7  | 90.9  | 93.0  | 107.8 | --    | 0.576 | 0.572 |
| COM           | 84.8  | 86.1  | 21.8  | 21.3  | 23.0  | 22.9  | 22.1  | --    | 0.160 |
| MAR           | 164.5 | 82.9  | 21.2  | 21.3  | 22.3  | 21.8  | 21.4  | 262.3 | --    |
| Mean $F_{ST}$ | 0.504 | 0.453 | 0.424 | 0.408 | 0.399 | 0.404 | 0.383 | 0.489 | 0.487 |

200

## 201 Results:

202 We generated 343,875,880 reads with an average of 5,828,404 sequences per individual  
 203 (min. = 446,872 and max. = 40,982,490). Our total RAD data set included 360,534 unique loci.  
 204 After filtering, we retained 6,019 loci and 10,392 SNPs (mean = 1.73 SNPs per locus). This final  
 205 data set had genotype calls for ~65% of all SNPs. Nucleotide diversity ( $\pi$ ) was highest in the  
 206 White Mantle and Learnard populations (0.131 and 0.114, respectively) and lowest in the Treaty,  
 207 Bear, and William Brown populations (0.026-0.056; Table 1). Heterozygosity followed the same  
 208 pattern as  $\pi$  (Table 1). The inbreeding coefficient ( $F_{IS}$ ) was highest in the Davidson and Comox  
 209 populations (0.037 and 0.034, respectively) and lowest in Bear (-0.013) and Treaty (-0.012;  
 210 Table 1). Mean differentiation ( $F_{ST}$ ) for all pairwise comparisons was 0.439. The Learnard  
 211 population from southern Alaska was, on average, the most differentiated from all others (mean  
 212  $F_{ST}$  = 0.504) and White Mantle was the least differentiated (mean  $F_{ST}$  = 0.383; Table 2). We  
 213 detected no association between genetic and geographic distances in either study area-wide  
 214 Mantel tests (Mantel's  $r$ , all populations = -0.04,  $P$  = 0.42; Mantel's  $r$ , no VI populations = 0.15,



215  $P = 0.36$ ). There was, however, a signature of IBD within group II (Mantel's  $r$ , group I = 0.839,  
216  $P = 0.025$ ) but not within group I (Mantel's  $r$ , group II = 0.839,  $P = 0.082$ ).

217 Our DAPC analyses supported  $K = 6$  as the optimal number of genetic clusters (Figs. 2A,C). For  
218 ADMIXTURE, our results supported  $K = 7$  as the best-fit to the data (Figs. 2B,C) and the  
219 SVDQuartets phylogeny largely mirrored both lines of population structure evidence (Fig. 2D).

220 All analyses supported multiple independent genetic clusters of ice worms, many more than three  
221 clades identified in previous studies [e.g., 25]. Our DAPC and ADMIXTURE results differed in  
222 two ways: (1) DAPC analyses grouped the Treaty, Bear, and William Brown populations into  
223 one cluster (as did SVDQuartets) whereas ADMIXTURE split William Brown into its own  
224 cluster, and this accounted for the  $K = 6$  versus  $K = 7$  discrepancy between the two approaches.  
225 (2) ADMIXTURE also split Learnard (southern Alaska) and the two Vancouver Island  
226 populations – Comox and Mariner – into two clusters with one sample, MS5 (red asterisks in  
227 Fig. 2), almost evenly split in terms of ancestry between the two. Conversely, DAPC split  
228 Learnard and Comox+Mariner into two clusters with MS5 completely assigned to the Learnard  
229 cluster, despite MS5 being sampled from the Mariner glacier far to the south (Figs. 1,2). Aside  
230 from the best-fit solutions, we also observed a second common ADMIXTURE solution for  $K = 7$   
231 which differed from the best-fit solution in one way; rather than splitting Treaty+Bear and  
232 William Brown into two clusters (Fig. 2B), Bear specimens were almost evenly admixed  
233 between Treaty and William Brown (Fig. S3), its two closest neighbors to the north and south,  
234 respectively. Finally, because our SNP filtering focused on overarching patterns in the data set,  
235 and likely overlooked some degree of population-specific detail, our results are likely  
236 conservative estimates of genetic structure in the group.

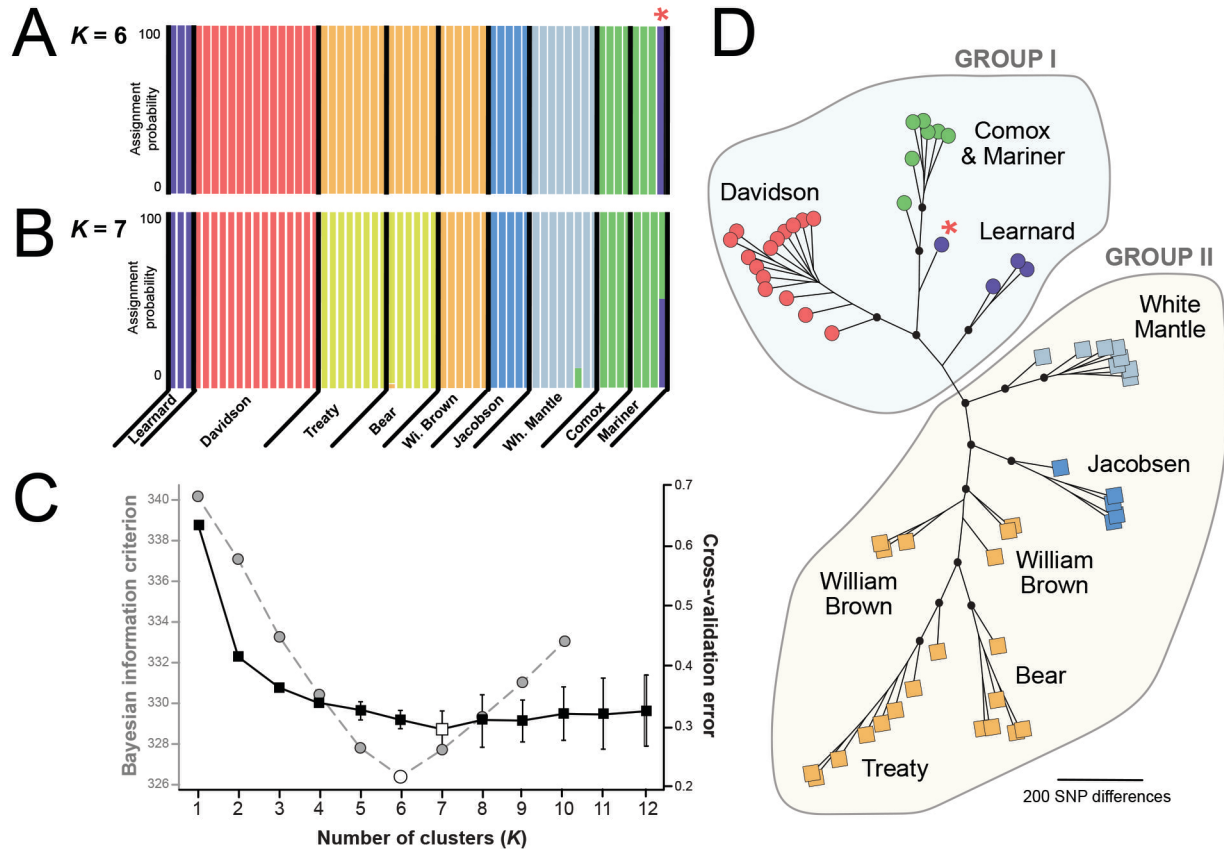

237

238 **Figure 2.** Population genetic structure of ice worms based upon (A) a discriminant analysis of principal  
 239 components (DAPC) for  $K = 6$  and (B) ADMIXTURE results for  $K = 7$ . (C) Comparisons of support for  
 240 different values of  $K$  for DAPC (Bayesian information criterion, BIC; gray dashed line, left y-axis) and  
 241 Admixture (cross-validation error, CV; dark line, right y-axis). The best-fit  $K$  (white square,  
 242 ADMIXTURE; white circle, DAPC) corresponds to the  $K$  at which CV (ADMIXTURE) or BIC (DAPC)  
 243 was minimized, respectively. For ADMIXTURE, vertical white bars represent the standard deviation of  
 244 values for each  $K$  across 25 replicates. (D) An unrooted phylogeny of ice worms generated with  
 245 SVDQuartets. Tip colorations reflect assignments in (A). Dark circles indicate nodes with  $> 95\%$   
 246 bootstrap support. Specimens in group I (circles) and II (squares) are denoted with different symbols.  
 247 Asterisks highlight a single specimen, MS5, which showed evidence of shared ancestry across  
 248 geographically disjunct populations, indicating LDD.  
 249

250 Our fineRADstructure results mirrored those from DAPC, identifying the same six  
 251 genetic clusters with MS5 assigned to the Learnard cluster rather than the Comox/Mariner  
 252 cluster. Still, MS5 again exhibited substantial evidence for shared ancestry between the Learnard  
 253 and Comox/Mariner genetic clusters (Fig. 1). On average, MS5 shared 411 loci with Learnard  
 254 ice worms and 220 loci with ice worms from the Comox and Mariner ice worms (Fig. 1), a  
 255 roughly 60/40 split between the two clusters. Notably, MS5 also exhibited the highest  
 256 heterozygosity of any individual in the study (and this result did not stem from outsized

257 coverage, Fig. S4). Our fineRADstructure analysis also revealed the potential for an overarching,  
258 deep divergence between two groups of ice worm populations (groups I and II; Fig. 1). This split  
259 was corroborated by both SVDQuartets (Fig. 2D) and  $F_{ST}$  comparisons. Mean pairwise  $F_{ST}$   
260 among populations within groups I and II were 0.21 and 0.30, respectively. Across groups,  
261 however, mean pairwise  $F_{ST}$  was 0.60. Mean distance to the Pacific Ocean also differed between  
262 groups by 100.5 km (group I = 73.3 km, group II = 173.8 km; ANOVA,  $P < 0.001$ ).

263 To be clear, the geographic groupings (I and II) described in this study are with respect to  
264 the Coast Mountains, and specifically a putative ice ridge that formed along the crest of the range  
265 during the Pleistocene [28]. All populations, regardless of grouping, followed the known pattern  
266 of ice worms inhabiting relatively coastal glaciers (see Fig. S1). Interestingly, while the  
267 geographic location of 8 of 9 populations fell on either side of the putative ice ridge, one  
268 population did not: White Mantle. Our resolution of a deep, two-group split within ice worms  
269 adds new clarification to the three-clade result identified by earlier studies [e.g., 23, 25], showing  
270 that the previously recognized northern and central clades should likely be lumped together (now  
271 group I).

272

## 273 **Discussion:**

274 Historical and contemporary factors, both biotic and abiotic, interact to shape the present-  
275 day genetic structure of populations and species. Disentangling their varied contributions can be  
276 difficult, however, particularly when evolutionary histories are muddled by unexpected events  
277 (e.g., LDD of an organism with limited potential for active dispersal). The modern population  
278 genomic toolkit provides historically unprecedented power to resolve biogeographical  
279 complexity by allowing more quantitative perspectives of relatedness and greatly improved  
280 resolution of genetic independence or similarity [42]. In this study, we used a population  
281 genomic data set to refine understanding of the evolution history of the extremophile, glacier-  
282 obligate ice worm, *M. solifugus*. Our results provide a clear genomic perspective of LDD,  
283 showing unequivocally that migration has occurred between southern Alaska and the glaciers of  
284 Vancouver Island ~1,900 km to the south and across the Pacific Ocean. We also provide an  
285 independent line of biological evidence in support of the geological hypothesis that an ice ridge  
286 formed along the crest of the Coast Mountains during the Pleistocene [28].

287           The recent biogeographic history of ice worms appears to have been shaped by three  
288 main factors: i) ice sheet dynamics (likely during the Pleistocene), ii) mountaintop isolation from  
289 conspecifics following the retreat of Pleistocene ice into higher elevations, and iii) LDD.

290

291           i. Evidence for the first, overarching factor that has defined the recent evolution of ice  
292 worms lies in our overwhelming support for divergence between two overarching  
293 groups of ice worms (I and II). During the Pleistocene, ice was generated in the high  
294 peaks of the Coast Mountains and subsequently flowed west to the Pacific and east to  
295 the BC interior [28, 43, 44]. This potential western-eastern divergence in ice worms  
296 aligns with this divide, suggesting that each group diverged in allopatry from their  
297 conspecifics. At its maximum, the Cordilleran ice sheet was a ~2,000-3,000 m high  
298 convex dish with gentle interior slopes that steepened at its periphery [28, 45]. Given  
299 the sensitivity of ice worms to extreme cold [23], populations likely only persisted on  
300 the margins of the ice sheet, as their present-day occurrences on the lower flanks of  
301 higher elevation, low-latitude glaciers suggest. It is possible that, as suggested  
302 previously [23, 25], the Boundary Ranges (the most northern subrange of the Coast  
303 Mountains), are actually the biogeographic barrier that drove the observed deep  
304 divergence in ice worms described in this study. However, without more fine-scale  
305 population genomic sampling on both sides of the Coast Mountains (including the  
306 Boundary Ranges), this nuance of ice worm biogeography will remain unclear. In the  
307 same vein, the strong genetic similarity of White Mantle to populations east of the  
308 proposed ice ridge (Fig. 1), despite falling on its western side indicates that either the  
309 ice ridge actually formed more to the west than previously thought [28], the White  
310 Mantle population has migrated west since the end of the Pleistocene, or the ice ridge  
311 itself was not a barrier driving differentiation (as discussed above).

312           ii. The Cordilleran ice sheet was seeded by alpine glaciers and throughout western North  
313 America, the ice sheet's signature persists in mountainous regions. While the specific  
314 dynamics of deglaciation on valley and drainage scales are unknown, a safe  
315 assumption is that glaciers retreated from valleys into higher elevations, likely with  
316 ice worm populations in tow. Increasing mountaintop isolation and subsequent  
317 genetic drift likely precipitated more recent differentiation within groups I and II

318 since their initial split. Evidence for IBD within group II supports this hypothesis.  
319 The lack of support for IBD in group I may simply reflect a smaller sample size or  
320 LDD maintaining connections over larger spatial scales than a purely IBD model  
321 would predict.

322 iii. Despite limited sampling, we were able to identify one instance of recent LDD among  
323 geographically disparate ice worm populations. Indeed, with a roughly 60/40 ancestry  
324 split between the Mariner/Comox and Learnard clusters, one specimen (MS5), is  
325 likely the progeny of recent hybridization between the two. This indicates that LDD is  
326 both ongoing in ice worms and perhaps not particularly rare. The most plausible  
327 mechanism for ice worm LDD is passive dispersal of mucous-coated ice worm  
328 cocoons on southward migrating birds [e.g., 12]. Several passerines (e.g., Gray-  
329 crowned rosy finches, *Leucosticte tephrocotis*) have been observed feeding on ice  
330 worms [46, 47; S.H., personal observation] and the presence of an ice worm clitellum  
331 [48] indicates that ice worms, like other *Mesenchytraeus* species, reproduce by egg-  
332 laden cocoons [23]. The seemingly exclusive north-to-south pattern of ice worm LDD  
333 also has temporal support from bird migratory behavior. Indeed, late autumn ice  
334 worm reproduction [at the end of the productive season on mountain glaciers, 49]  
335 likely occurs in concert with southward-migrating birds stopping to feed on glaciers  
336 free of seasonal snow. In contrast, returning spring migrants pass over the same  
337 glaciers when seasonal snowfall still covers overwintering ice worms [23], limiting  
338 the potential for LDD in the reverse direction.

339  
340 One question remains, however, if birds are precipitating LDD in ice worms, why has it  
341 only been observed for populations west of the Coast Mountains? This curiosity ties in to an  
342 important question in North American biogeography: to what extent have ice sheets driven  
343 present-day patterns of speciation and genetic differentiation among fauna of the northwest? For  
344 ice worms, we hypothesize that ice worm populations comprising groups I and II have  
345 accumulated some degree of reproductive isolation and are either already species-level lineages  
346 or on their way to this conclusion. Thus, we predict a zygotic barrier may be limiting inter-group  
347 migrants from leaving a genomic signature of their presence. It is also possible, and perhaps  
348 likely, that LDD in ice worms is merely the result of vector migration patterns. For instance, *L.*

349 *tephrocotis*, like other songbirds [50], may preferentially follow coastlines during migration.  
350 However, until more is known about the specific interactions of ice worms with various bird  
351 species, and thus their potential to act as LDD vectors, relating bird migrations to ice worm  
352 distributions will remain difficult. Beyond ice worms, ice sheets have been implicated as a key  
353 driver of speciation in boreal birds [51] and phylogeographic structure of many taxa, from  
354 nematodes to gray wolves [17, 29, 52-54], and our results clearly support these broader  
355 implications for biodiversity accumulation and maintenance in North America.

356

### 357 *Conclusions*

358 In this study, we leveraged population genomic data to unravel the complex evolutionary  
359 history of the North American ice worm, *M. solifugus*. Our results add new clarity to previous  
360 perspectives on ice worm biogeography while also lending genomic support to the existence of  
361 contemporary, passerine-mediated LDD in the group. While the phylogenetic data used in this  
362 study (i.e., the lack of an outgroup) preclude us from diagnosing groups I and II as monophyletic,  
363 given the results of previous studies [23-25], we predict that future efforts will diagnose them as  
364 such, perhaps even representing two distinct species. Finally, our genomic data lend support to  
365 the glaciological record in the region, adding a biological line of evidence to a postulated north-  
366 south ice ridge that formed along the crest of the Coast Mountains during the Pleistocene [28].  
367 This potential for genomics to inform the geological record is intriguing and ice worms, as a rare  
368 glacier-obligate macroinvertebrate, may be an ideal taxon for similar studies in the future.

369

370 **Acknowledgements:** We thank Joe Giersch for map making assistance and the University of  
371 Kentucky Center for Computational Sciences for high-performance computing resources. This  
372 research was partially funded by NSF award #IOS-082050 to D.H.S.

373

374 **Competing interests:** We have no competing interests.

375

376 **Author contributions:** S.H., D.H.S., L.M.T, and D.W.W. conceived of and funded the study.  
377 S.H., D.H.S., S.A.L, R.K.B., and D.W.W. collected the data. S.H. and J.L.K. analyzed the data  
378 and wrote the manuscript with input from D.H.S., R.K.B., and D.W.W. All authors approved the  
379 final version.



380

381 **Data accessibility:** Raw sequence data for this study has been submitted to GenBank under  
382 BioProject #PRJNA479335 and code to reproduce the analyses is deposited on GitHub  
383 ([https://github.com/scotthotaling/ice\\_worm\\_ddRAD](https://github.com/scotthotaling/ice_worm_ddRAD)).

384

385 **Funding:** Field sampling for this study was supported by NSF award #IOS-0820505 to D.H.S.

386

387 **References:**

- 388 1. Darwin C. 1859 *On the origin of species*, Routledge.
- 389 2. Martin C.H., Turner B.J. 2018 Long-distance dispersal over land by fishes: extremely  
390 rare ecological events become probable over millennial timescales. *Proc R Soc B* **285**(1881),  
391 20172436.
- 392 3. Trakhtenbrot A., Nathan R., Perry G., Richardson D.M. 2005 The importance of long -  
393 distance dispersal in biodiversity conservation. *Diversity and Distributions* **11**(2), 173-181.
- 394 4. Helmuth B., Veit R., Holberton R. 1994 Long-distance dispersal of a subantarctic  
395 brooding bivalve (*Gaimardia trapesina*) by kelp-rafting. *Marine biology* **120**(3), 421-426.
- 396 5. Viana D.S., Gangoso L., Bouten W., Figuerola J. 2016 Overseas seed dispersal by  
397 migratory birds. *Proc R Soc B* **283**(1822), 20152406.
- 398 6. Gittenberger E., Groenenberg D.S., Kokshoorn B., Preece R.C. 2006 Biogeography:  
399 molecular trails from hitch-hiking snails. *Nature* **439**(7075), 409.
- 400 7. Miura O., Torchin M.E., Bermingham E., Jacobs D.K., Hechinger R.F. 2012 Flying  
401 shells: historical dispersal of marine snails across Central America. *Proc R Soc B* **279**(1731),  
402 1061-1067.
- 403 8. Pearce T.A., Mulvihill R.S., Porter K.A. 2012 Land slugs (Gastropoda: Pulmonata) on  
404 birds demonstrate dispersal potential. *Nautilus* **126**, 38-40.
- 405 9. Suetsugu K., Funaki S., Takahashi A., Ito K., Yokoyama T. 2018 Potential role of bird  
406 predation in the dispersal of otherwise flightless stick insects. *Ecology*.
- 407 10. Campos-Arceiz A., Larrinaga A.R., Weerasinghe U.R., Takatsuki S., Pastorini J.,  
408 Leimgruber P., Fernando P., Santamaría L. 2008 Behavior rather than diet mediates seasonal  
409 differences in seed dispersal by Asian elephants. *Ecology* **89**(10), 2684-2691.
- 410 11. Anderson J.T., Nuttle T., Rojas J.S.S., Pendergast T.H., Flecker A.S. 2011 Extremely  
411 long-distance seed dispersal by an overfished Amazonian frugivore. *Proceedings of the Royal*  
412 *Society of London B: Biological Sciences*, rspb20110155.

- 413 12. Viana D.S., Santamaría L., Figuerola J. 2016 Migratory birds as global dispersal vectors.  
414 *Trends in ecology & evolution* **31**(10), 763-775.
- 415 13. Somveille M., Manica A., Butchart S.H., Rodrigues A.S. 2013 Mapping global diversity  
416 patterns for migratory birds. *PloS one* **8**(8), e70907.
- 417 14. Simpson G.G. 1940 Mammals and land bridges. *Journal of the Washington Academy of*  
418 *Sciences* **30**(4), 137-163.
- 419 15. Slatkin M. 1987 Gene flow and the geographic structure of natural populations. *Science*  
420 **236**(4803), 787-792.
- 421 16. Hohenlohe P.A., Day M.D., Amish S.J., Miller M.R., Kamps-Hughes N., Boyer M.C.,  
422 Muhlfeld C.C., Allendorf F.W., Johnson E.A., Luikart G. 2013 Genomic patterns of  
423 introgression in rainbow and westslope cutthroat trout illuminated by overlapping paired-end  
424 RAD sequencing. *Molecular ecology* **22**(11), 3002-3013. (doi:10.1111/mec.12239).
- 425 17. Hotaling S., Muhlfeld C.C., Giersch J.J., Ali O.A., Jordan S., Miller M.R., Luikart G.,  
426 Weisrock D.W. 2018 Demographic modelling reveals a history of divergence with gene flow for  
427 a glacially tied stonefly in a changing post - Pleistocene landscape. *Journal of Biogeography*  
428 **45**(2), 304-317.
- 429 18. Jordan S., Giersch J.J., Muhlfeld C.C., Hotaling S., Fanning L., Tappenbeck T.H.,  
430 Luikart G. 2016 Loss of genetic diversity and increased subdivision in an endemic alpine  
431 stonefly threatened by climate change. *PloS one* **11**(6), e0157386.
- 432 19. Antonelli A., Kissling W.D., Flantua S.G., Bermúdez M.A., Mulch A., Muellner-Riehl  
433 A.N., Kreft H., Linder H.P., Badgley C., Fjeldså J. 2018 Geological and climatic influences on  
434 mountain biodiversity. *Nature Geoscience* **11**(10), 718.
- 435 20. Taberlet P., Fumagalli L., Wust-Saucy A., Cosson J. 1998 Comparative phylogeography  
436 and postglacial colonization routes in Europe. *Molecular ecology* **7**(4), 453-464.
- 437 21. Emery C. 1898 Diagnosi di un nuovi genere e nuova specie di anelidi della famiglia  
438 degli Enchytraeidae. *Atti R Accademei Lincei* **5**, 100-111.
- 439 22. Liang Y., Hsu C., Chang T. 1979 A new genus and species of Enchytraeidae from Tibet.  
440 *Acta Zootaxonomica Sinica* **4**, 312-317.
- 441 23. Dial R.J., Becker M., Hope A.G., Dial C.R., Thomas J., Slobodenko K.A., Golden T.S.,  
442 Shain D.H. 2016 The role of temperature in the distribution of the glacier ice worm,  
443 *Mesenchytraeus solifugus* (Annelida: Oligochaeta: Enchytraeidae). *Arctic, Antarctic, and Alpine*  
444 *Research* **48**(1), 199-211.
- 445 24. Hartzell P.L., Nghiem J.V., Richio K.J., Shain D.H. 2005 Distribution and phylogeny of  
446 glacier ice worms (*Mesenchytraeus solifugus* and *Mesenchytraeus solifugus rainierensis*).  
447 *Canadian Journal of Zoology* **83**(9), 1206-1213. (doi:10.1139/z05-116).

- 448 25. Dial C.R., Dial R.J., Saunders R., Lang S.A., Lee B., Wimberger P., Dinapoli M.S.,  
449 Egiazarov A.S., Gipple S.L., Maghirang M.R., et al. 2012 Historical biogeography of the North  
450 American glacier ice worm, *Mesenchytraeus solifugus* (Annelida: Oligochaeta: Enchytraeidae).  
451 *Mol Phylogenet Evol* **63**(3), 577-584. (doi:10.1016/j.ympev.2012.01.008).
- 452 26. Lang S.A., Saglam N., Kawash J., Shain D.H. 2017 Punctuated invasion of water, ice,  
453 snow and terrestrial ecozones by segmented worms (Oligochaeta: Enchytraeidae:  
454 *Mesenchytraeus*). *Proc R Soc B* **284**(1864), 20171081.
- 455 27. Figuerola J., Green A.J., Michot T.C. 2004 Invertebrate eggs can fly: evidence of  
456 waterfowl-mediated gene flow in aquatic invertebrates. *The American naturalist* **165**(2), 274-  
457 280.
- 458 28. Clague J.J., Ward B. 2011 Pleistocene glaciation of British Columbia. In *Developments*  
459 *in Quaternary Sciences* (pp. 563-573, Elsevier).
- 460 29. Shafer A.B., Cullingham C.I., Cote S.D., Coltman D.W. 2010 Of glaciers and refugia: a  
461 decade of study sheds new light on the phylogeography of northwestern North America.  
462 *Molecular ecology* **19**(21), 4589-4621. (doi:10.1111/j.1365-294X.2010.04828.x).
- 463 30. Peterson B.K., Weber J.N., Kay E.H., Fisher H.S., Hoekstra H.E. 2012 Double digest  
464 RADseq: an inexpensive method for de novo SNP discovery and genotyping in model and non-  
465 model species. *PLoS one* **7**(5), e37135. (doi:10.1371/journal.pone.0037135).
- 466 31. Burford Reiskind M., Coyle K., Daniels H., Labadie P., Reiskind M., Roberts N., Roberts  
467 R., Schaff J., Vargo E. 2016 Development of a universal double - digest RAD sequencing  
468 approach for a group of nonmodel, ecologically and economically important insect and fish taxa.  
469 *Molecular ecology resources* **16**(6), 1303-1314.
- 470 32. Catchen J., Hohenlohe P.A., Bassham S., Amores A., Cresko W.A. 2013 Stacks: an  
471 analysis tool set for population genomics. *Molecular ecology* **22**(11), 3124-3140.
- 472 33. Purcell S., Neale B., Todd-Brown K., Thomas L., Ferreira M.A., Bender D., Maller J.,  
473 Sklar P., De Bakker P.I., Daly M.J. 2007 PLINK: a tool set for whole-genome association and  
474 population-based linkage analyses. *The American Journal of Human Genetics* **81**(3), 559-575.
- 475 34. Weir B.S., Cockerham C. 1996 Genetic data analysis II: Methods for discrete population  
476 genetic data. Sinauer Assoc. Inc, Sunderland, MA, USA.
- 477 35. Wright S. 1943 Isolation by distance. *Genetics* **28**(2), 114-138.
- 478 36. Meirmans P.G., Van Tienderen P.H. 2004 GENOTYPE and GENODIVE: two programs  
479 for the analysis of genetic diversity of asexual organisms. *Molecular Ecology Resources* **4**(4),  
480 792-794.
- 481 37. Alexander D.H., Novembre J., Lange K. 2009 Fast model-based estimation of ancestry in  
482 unrelated individuals. *Genome Res* **19**(9), 1655-1664. (doi:10.1101/gr.094052.109).

- 483 38. Jombart T., Devillard S., Balloux F. 2010 Discriminant analysis of principal components:  
484 a new method for the analysis of genetically structured populations. *BMC genetics* **11**(1), 94.
- 485 39. Malinsky M., Trucchi E., Lawson D.J., Falush D. 2018 RADpainter and  
486 fineRADstructure: population inference from RADseq data. *Molecular biology and evolution*  
487 **35**(5), 1284-1290.
- 488 40. Chifman J., Kubatko L. 2014 Quartet inference from SNP data under the coalescent  
489 model. *Bioinformatics* **30**(23), 3317-3324.
- 490 41. Swofford D.L. 1998 Phylogenetic analysis using parsimony.
- 491 42. Allendorf F.W., Hohenlohe P.A., Luikart G. 2010 Genomics and the future of  
492 conservation genetics. *Nat Rev Genet* **11**(10), 697-709. (doi:10.1038/nrg2844).
- 493 43. Margold M., Jansson K.N., Kleman J., Stroeven A.P., Clague J.J. 2013 Retreat pattern of  
494 the Cordilleran Ice Sheet in central British Columbia at the end of the last glaciation  
495 reconstructed from glacial meltwater landforms. *Boreas* **42**(4), 830-847.
- 496 44. Stumpf A.J., Broster B.E., Levson V.M. 2000 Multiphase flow of the late Wisconsinan  
497 Cordilleran ice sheet in western Canada. *Geological Society of America Bulletin* **112**(12), 1850-  
498 1863.
- 499 45. Wilson J., Falconer G., Mathews W., Prest V. 1958 Glacial map of Canada. *Geological*  
500 *Association of Canada, Toronto, ON*.
- 501 46. Riedel J.L., Wilson S., Baccus W., Larrabee M., Fudge T., Fountain A. 2015 Glacier  
502 status and contribution to streamflow in the Olympic Mountains, Washington, USA. *Journal of*  
503 *Glaciology* **61**(225), 8-16.
- 504 47. Rosvold J. 2016 Perennial ice and snow-covered land as important ecosystems for birds  
505 and mammals. *Journal of biogeography* **43**(1), 3-12.
- 506 48. Shain D.H., Carter M.R., Murray K.P., Maleski K.A., Smith N.R., McBride T.R.,  
507 Michalewicz L.A., Saidel W.M. 2000 Morphologic characterization of the ice worm  
508 *Mesenchytraeus solifugus*. *Journal of Morphology* **246**(3), 192-197.
- 509 49. Hotaling S., Hood E., Hamilton T.L. 2017 Microbial ecology of mountain glacier  
510 ecosystems: biodiversity, ecological connections and implications of a warming climate.  
511 *Environmental microbiology* **19**(8), 2935-2948.
- 512 50. Rugg K.C., Smith T.B. 2002 Not as the crow flies: a historical explanation for circuitous  
513 migration in Swainson's thrush (*Catharus ustulatus*). *Proceedings of the Royal Society of London*  
514 *B: Biological Sciences* **269**(1498), 1375-1381.
- 515 51. Weir J.T., Schluter D. 2004 Ice sheets promote speciation in boreal birds. *Proceedings of*  
516 *the Royal Society of London B: Biological Sciences* **271**(1551), 1881-1887.

- 517 52. Muñoz-Fuentes V., Darimont C.T., Wayne R.K., Paquet P.C., Leonard J.A. 2009  
518 Ecological factors drive differentiation in wolves from British Columbia. *Journal of*  
519 *Biogeography* **36**(8), 1516-1531.
- 520 53. Burg T.M., Gaston A.J., Winker K., Friesen V.L. 2006 Effects of Pleistocene glaciations  
521 on population structure of North American chestnut - backed chickadees. *Molecular ecology*  
522 **15**(9), 2409-2419.
- 523 54. Koehler A.V., Hoberg E.P., Dokuchaev N.E., Tranbenkova N.A., Whitman J.S.,  
524 Nagorsen D.W., Cook J.A. 2009 Phylogeography of a Holarctic nematode, *Soboliphyme*  
525 *baturini*, among mustelids: climate change, episodic colonization, and diversification in a  
526 complex host–parasite system. *Biological Journal of the Linnean Society* **96**(3), 651-663.  
527
