# Supplementary material for: Long-distance dispersal, ice sheet dynamics, and mountaintop isolation underlie the genetic structure of glacier ice worms
Source: bioRxiv or medRxiv preprint supplement (doi:10.1101/463521), 2019-04-26
Supplement: Supplementary file [file 463521-1.pdf]

1 **Long-distance dispersal, ice sheet dynamics, and mountaintop isolation underlie the genetic**  
2 **structure of glacier ice worms**

3  
4 Scott Hotaling<sup>1</sup>, Daniel H. Shain<sup>2</sup>, Shirley A. Lang<sup>3</sup>, Robin K. Bagley<sup>4</sup>, Lusha M. Tronstad<sup>5</sup>,  
5 David W. Weisrock<sup>6</sup>, and Joanna L. Kelley<sup>1</sup>

6  
7 **Affiliations:**

8 <sup>1</sup> School of Biological Sciences, Washington State University, Pullman, WA, USA

9 <sup>2</sup> Department of Biology, Rutgers University, Camden, NJ, USA

10 <sup>3</sup> Graduate School of Biomedical Sciences, Rowan University, Stratford, NJ, USA

11 <sup>4</sup> Department of Biology, University of Iowa, Iowa City, IA

12 <sup>5</sup> Department of Zoology and Physiology, University of Wyoming, Laramie, WY, USA

13 <sup>6</sup> Department of Biology, University of Kentucky, Lexington, KY, USA

14  
15 **Correspondence:** Scott Hotaling, School of Biological Sciences, Washington State University,  
16 Pullman, WA, 99164, USA; Email: [scott.hotaling@wsu.edu](mailto:scott.hotaling@wsu.edu); Phone: (828) 507-9950

17  
18 **Supplementary Figures:**

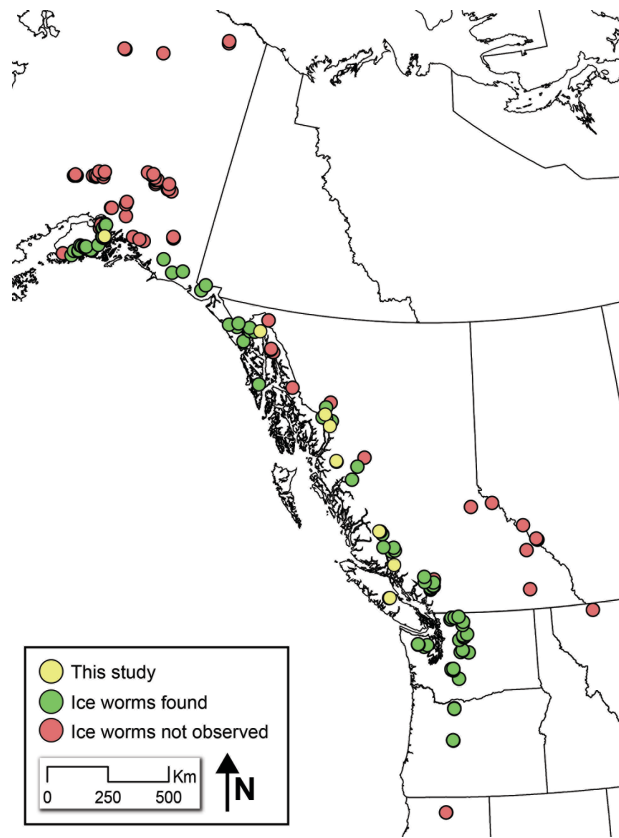

**Figure S1.** The known distribution of ice worms (*Mesenchytraeus solifugus*). Presence and absence information stems from a collection of personal communication with Roman Dial and previous published manuscripts [1-3].

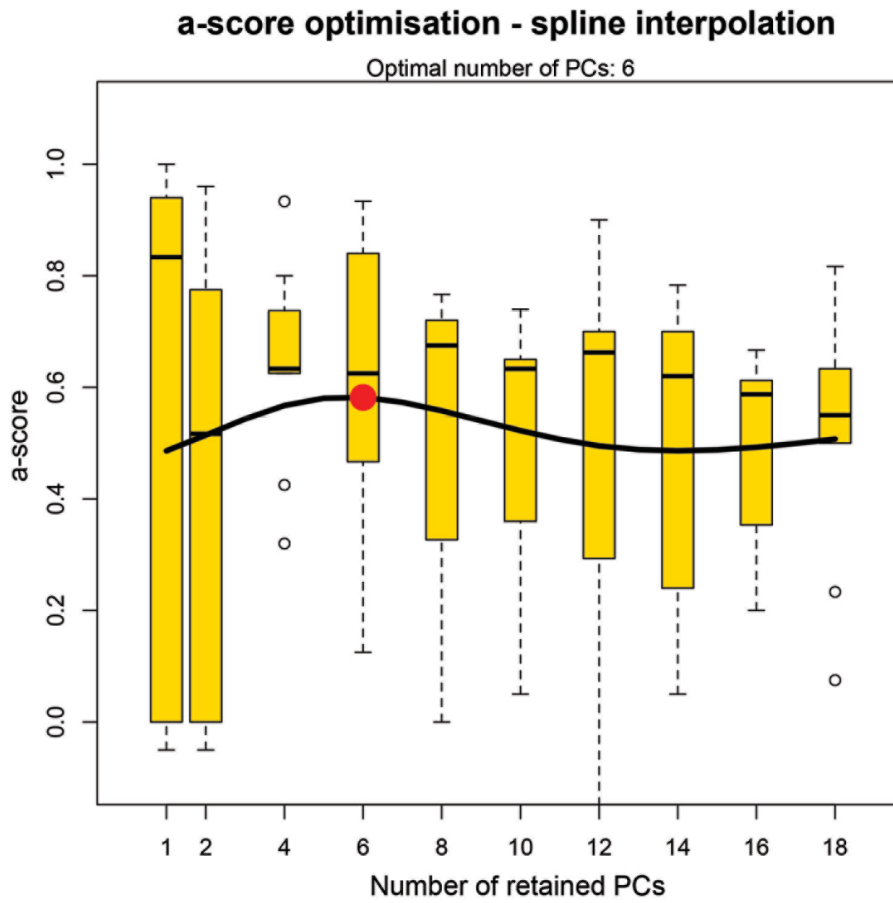

25  
26  
27  
28

**Figure S2.** An  $\alpha$ -score plot for identifying the optimal number of principal components (PCs) to retain in DAPC analyses. The optimal number of PCs to retain (6) is highlighted by a red circle.

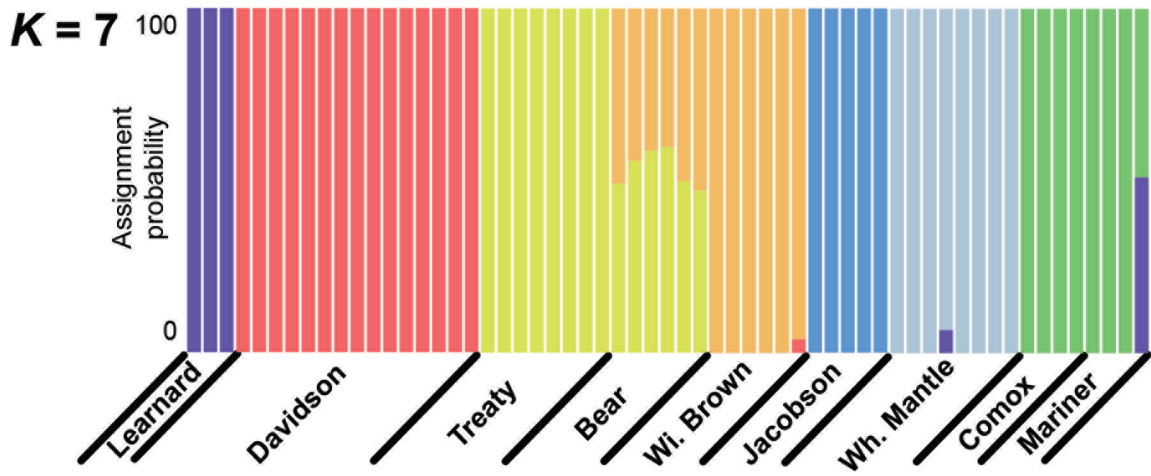

29  
 30 **Figure S3.** A secondary ADMIXTURE solution for  $K = 7$  shared by several runs which were the  
 31 best-fit (minimized cross-validation error) for their individual replicates, but not the best-fit for  $K$   
 32  $= 7$  overall.

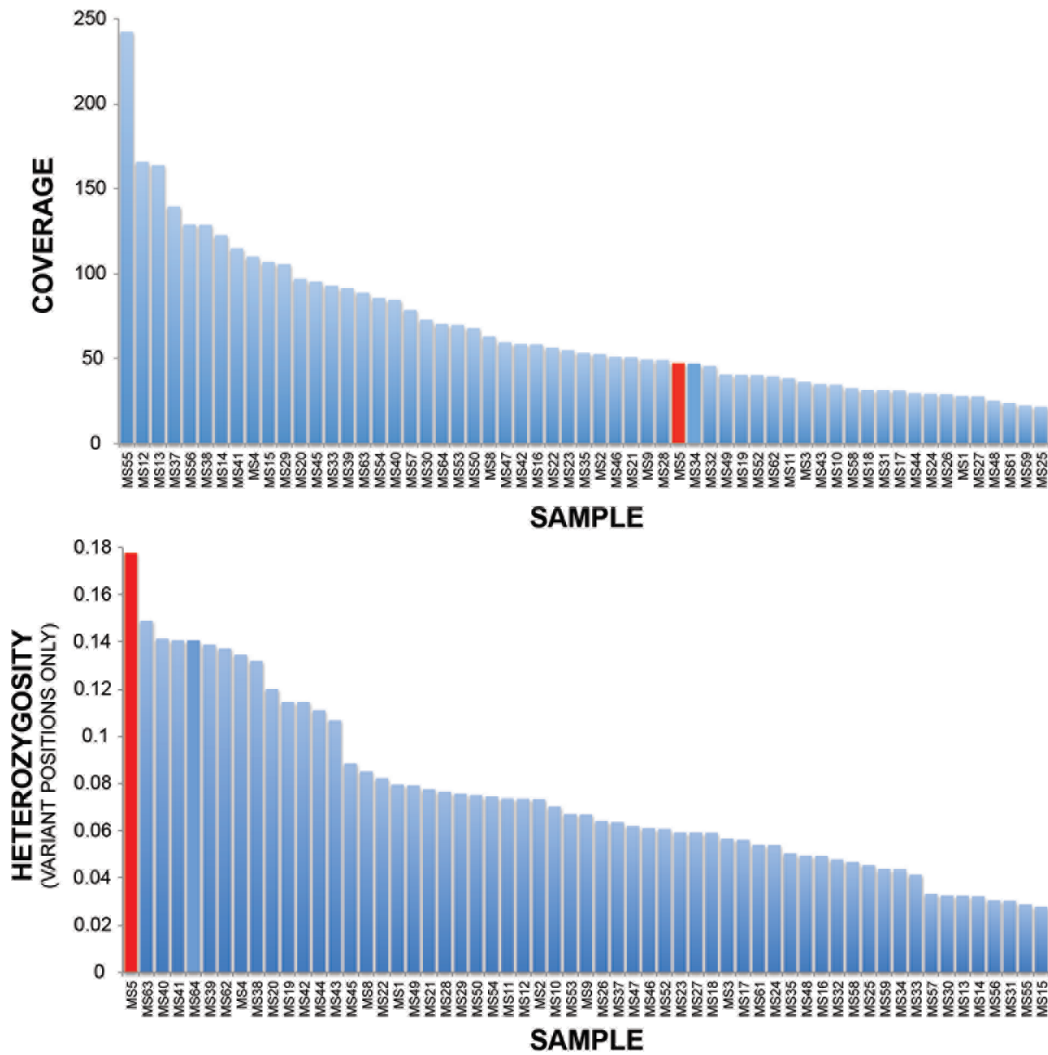

33  
 34  
 35  
 36  
 37  
 38

**Figure S4.** Mean coverage and heterozygosity (variant positions only) for all ice worms included in this study. Red bars highlight a single individual (MS5) which bore a signature of substantial admixture between southern Alaska (Leonard Glacier population) and Vancouver Island (Mariner Glacier population).

39 **References:**

- 40 1. Dial R.J., Becker M., Hope A.G., Dial C.R., Thomas J., Slobodenko K.A., Golden T.S.,  
41 Shain D.H. 2016 The role of temperature in the distribution of the glacier ice worm,  
42 *Mesenchytraeus solifugus* (Annelida: Oligochaeta: Enchytraeidae). *Arctic, Antarctic, and Alpine*  
43 *Research* **48**(1), 199-211.
- 44 2. Dial C.R., Dial R.J., Saunders R., Lang S.A., Lee B., Wimberger P., Dinapoli M.S.,  
45 Egiazarov A.S., Gipple S.L., Maghirang M.R., et al. 2012 Historical biogeography of the North  
46 American glacier ice worm, *Mesenchytraeus solifugus* (Annelida: Oligochaeta: Enchytraeidae).  
47 *Mol Phylogenet Evol* **63**(3), 577-584. (doi:10.1016/j.ympev.2012.01.008).
- 48 3. Hartzell P.L., Nghiem J.V., Richio K.J., Shain D.H. 2005 Distribution and phylogeny of  
49 glacier ice worms (*Mesenchytraeus solifugus* and *Mesenchytraeus solifugus rainierensis*).  
50 *Canadian Journal of Zoology* **83**(9), 1206-1213. (doi:10.1139/z05-116).  
51
